# Supplementary material for: Deuterium-Depleted Water in Cancer Therapy: A Systematic Review of Clinical and Experimental Trials
Source: MDPI journal article supplement (doi:10.3390/nu16091397), 2024-05-06
Supplement: s1 [file s1]

WEBAPPENDIX FOR: "Deuterium-depleted water in the Cancer Therapy: A Systematic Review of Clinical and Experimental trials." Detailed search strategy

PubMed publisher

((("deuterium"[MeSH Terms] OR "deuterium"[All Fields] OR "deuteriums"[All Fields]) AND ("deplete"[All Fields] OR "depleted"[All Fields] OR "depletes"[All Fields] OR "depleting"[All Fields] OR "depletion"[All Fields] OR "depletions"[All Fields]) AND ("water"[MeSH Terms] OR "water"[All Fields] OR "watering"[All Fields] OR "water s"[All Fields] OR "watered"[All Fields] OR "waterer"[All Fields] OR "waterers"[All Fields] OR "waterings"[All Fields] OR "waters"[All Fields]))

Web-of-science

((TS=(deuterium deplet\*)) AND TS=(water))

Cochrane

(deuterium deplet\*)
